# Supplementary material for: The Deubiquitinase OTULIN Is an Essential Negative Regulator of Inflammation and Autoimmunity
Source: PubMed Central journal article supplement (PMC5002269; doi:10.1016/j.cell.2016.07.019), 2016-08-25
Supplement: mmc1.pdf [file mmc1.pdf]

**Cell, Volume 166**

**Supplemental Information**

**The Deubiquitinase OTULIN Is  
an Essential Negative Regulator  
of Inflammation and Autoimmunity**

**Rune Busk Damgaard, Jennifer A. Walker, Paola Marco-Casanova, Neil V. Morgan, Hannah L. Titheradge, Paul R. Elliott, Duncan McHale, Eamonn R. Maher, Andrew N.J. McKenzie, and David Komander**

**Table S1 (related to Figure 1). Serum immunoglobulin (Ig) levels from ORAS patients.**

Tabulated serum immunoglobulin (Ig) levels from ORAS patients IV:3, IV:4, and V:2. Age of the patient at the time of sampling is indicated. Concentration of Ig is mg/mL with age-corrected normal range shown in brackets. Red shading indicates measurements that exceed the normal range.

| Patient     | Time of sample            | Ig   | Concentration [mg/mL] (normal range) |
|-------------|---------------------------|------|--------------------------------------|
| <b>IV:3</b> |                           |      |                                      |
|             | Age 2 months              | IgG  | 8.48 (2.1-7.7)                       |
|             |                           | IgA  | 1.01 (0.05-0.4)                      |
|             |                           | IgM  | 1.07 (0.15-0.7)                      |
|             | Age 3 months              | IgG  | 6.18 (2.4-8.8)                       |
|             |                           | IgG1 | 6.18 (2.2-4.95)                      |
|             |                           | IgG2 | 0.57 (0.4-1.65)                      |
|             |                           | IgG3 | 0.99 (0.04-0.23)                     |
|             |                           | IgG4 | <0.11 (0.01-1.3)                     |
|             |                           | IgA  | 0.83 (0.1-0.6)                       |
|             |                           | IgM  | 1.38 (0.2-1.0)                       |
| <b>IV:4</b> |                           |      |                                      |
|             | Age 4 days                | IgG  | 5.58 (5.0-17)                        |
|             |                           | IgA  | <0.07 (0.01)                         |
|             |                           | IgM  | 0.11 (0.05-0.2)                      |
|             | Age 2 years and 10 months | IgG  | 13.5 (3.1-13.8)                      |
|             |                           | IgA  | 1.95 (0.3-1.2)                       |
|             |                           | IgM  | 1.05 (0.5-2.2)                       |
| <b>V:2</b>  |                           |      |                                      |
|             | Pre-infliximab            | IgG  | 11.0 (3.6-15.2)                      |
|             |                           | IgA  | 2.61 (0.35-1.39)                     |
|             |                           | IgM  | 3.35 (0.43-1.9)                      |
|             | Post-infliximab (4 years) | IgG  | 10.18 (4.9-16.1)                     |
|             |                           | IgA  | 0.93 (0.4-2.0)                       |
|             |                           | IgM  | 1.46 (0.5-2.0)                       |

**Table S3 (related to Figure 1). Pathogenic genetic variants in ORAS patients.**

Details of 50 genetic variants detected in the exome from an individual affected by ORAS and annotated as pathogenic in the ClinVar database (<http://www.ncbi.nlm.nih.gov/clinvar/>). In the majority of cases these variants had a maximum allele frequency (AF\_MAX) >0.1 in normal control databases of different populations and none were considered as a likely cause of the disease phenotype.

| Position chr:nucleotide | Change | Genotype | gene     | effect                                                          | dbSNP       | clinVar significance | AF_MAX   |
|-------------------------|--------|----------|----------|-----------------------------------------------------------------|-------------|----------------------|----------|
| 1:100672060             | T>C    | HOMO     | DBT      | missense variant                                                | rs12021720  | pathogenic           | 0.966783 |
| 1:161599693             | T>C    | HET      | FCGR3B   | missense variant                                                | rs76714703  | pathogenic           | 0.5605   |
| 1:98348885              | G>A    | HOMO     | DPYD     | missense variant                                                | rs1801265   | pathogenic           | 0.942308 |
| 10:54531242             | G>A    | HET      | MBL2     | missense variant                                                | rs5030737   | pathogenic           | 0.065963 |
| 10:70645376             | A>C    | HET      | STOX1    | missense variant                                                | rs10509305  | pathogenic           | 0.237569 |
| 11:113270828            | G>A    | HET      | ANKK1    | missense variant                                                | rs1800497   | pathogenic           | 0.388112 |
| 11:18290859             | C>T    | HET      | SAA1     | missense variant                                                | rs1136743   | pathogenic           | 0.608179 |
| 11:68846399             | A>T    | HET      | TPCN2    | missense variant                                                | rs35264875  | pathogenic           | 0.21504  |
| 11:68846399             | A>T    | HET      | TPCN2    | missense variant                                                | rs35264875  | pathogenic           | 0.21504  |
| 11:68855363             | G>A    | HET      | TPCN2    | missense variant                                                | rs3829241   | pathogenic           | 0.362797 |
| 12:121176083            | G>A    | HET      | ACADS    | missense variant & splice region variant                        | rs1799958   | pathogenic           | 0.314917 |
| 12:121437382            | A>G    | HOMO     | HNF1A    | missense variant                                                | rs1169305   | pathogenic           | 1        |
| 12:122295335            | T>C    | HOMO     | HPD      | missense variant                                                | rs1154510   | pathogenic           | 0.945122 |
| 14:21790040             | G>T    | HET      | RPGRIP1  | missense variant                                                | rs10151259  | pathogenic           | 0.240106 |
| 15:28230318             | C>T    | HET      | OCA2     | missense variant                                                | rs1800407   | pathogenic           | 0.079156 |
| 16:48258198             | C>T    | HOMO     | ABCC11   | missense variant                                                | rs17822931  | pathogenic           | 0.90035  |
| 16:56548501             | C>T    | HOMO     | BBS2     | missense variant                                                | rs4784677   | pathogenic           | 1        |
| 17:12899902             | C>T    | HET      | ELAC2    | missense variant                                                | rs5030739   | pathogenic           | 0.046174 |
| 17:12915009             | G>A    | HOMO     | ELAC2    | missense variant                                                | rs4792311   | pathogenic           | 0.327177 |
| 17:42453065             | A>C    | HET      | ITGA2B   | missense variant                                                | rs5911      | pathogenic           | 0.432927 |
| 17:48437456             | C>G    | HOMO     | XYLT2    | missense variant                                                | rs6504649   | pathogenic           | 0.41029  |
| 2:219755011             | T>A    | HOMO     | WNT10A   | missense variant                                                | rs121908120 | pathogenic           | 0.019789 |
| 20:43280227             | C>T    | HET      | ADA      | missense variant & NMD transcript variant                       | rs11555565  | pathogenic           | 0.067282 |
| 22:42522613             | G>C    | HOMO     | CYP2D6   | missense variant                                                | rs1135840   | pathogenic           | 0.519337 |
| 22:42523943             | A>G    | HOMO     | CYP2D6   | splice region variant & intron variant & NMD transcript variant | rs16947     | pathogenic           | 0.847902 |
| 22:42524243             | CT>C   | HET      | CYP2D6   | Frameshift variant & feature truncation                         | rs35742686  | pathogenic           | 0.021108 |
| 22:46731689             | G>T    | HET      | TRMU     | missense variant & NMD transcript variant                       | rs11090865  | pathogenic           | 0.22561  |
| 3:122003757             | G>T    | HET      | CASR     | missense variant                                                | rs1801725   | pathogenic           | 0.138522 |
| 4:102751076             | G>A    | HET      | BANK1    | missense variant                                                | rs10516487  | pathogenic           | 0.28628  |
| 4:187113041             | C>G    | HET      | CYP4V2   | missense variant                                                | rs1055138   | pathogenic           | 0.536939 |
| 5:118811533             | G>A    | HET      | HSD17B4  | missense variant                                                | rs25640     | pathogenic           | 0.497238 |
| 5:149212243             | G>C    | HET      | PPARGC1B | missense variant                                                | rs7732671   | pathogenic           | 0.160569 |
| 5:35861068              | T>C    | HET      | IL7R     | missense variant & NMD transcript variant                       | rs1494558   | pathogenic           | 0.745935 |
| 5:35861068              | T>C    | HET      | IL7R     | missense variant                                                | rs1494558   | pathogenic           | 0.745935 |
| 5:35871190              | G>A    | HET      | IL7R     | missense variant & NMD transcript variant                       | rs1494555   | pathogenic           | 0.902439 |
| 5:73981270              | T>C    | HOMO     | HEXB     | missense variant                                                | rs820878    | pathogenic           | 1        |

|              |     |      |          |                                                                 |             |                          |          |
|--------------|-----|------|----------|-----------------------------------------------------------------|-------------|--------------------------|----------|
| 6:29080344   | G>A | HET  | OR2J3    | missense variant                                                | rs3749977   | pathogenic               | 0.619919 |
| 7:138417791  | A>G | HET  | ATP6V0A4 | missense variant                                                | rs3807153   | pathogenic               | 0.219512 |
| 7:142458451  | A>T | HET  | PRSS1    | missense variant                                                | rs111033566 | pathogenic               | N/A      |
| 8:21976710   | T>C | HET  | HR       | missense variant                                                | rs7014851   | pathogenic               | 0.284553 |
| 9:136301982  | C>G | HET  | ADAMTS13 | missense variant                                                | rs2301612   | pathogenic               | 0.437995 |
| MT:6480      | G>A | HOMO | MT-CO1   | missense variant                                                | rs199476128 | pathogenic               | N/A      |
| 11:126162843 | C>T | HET  | TIRAP    | missense variant & NMD transcript variant                       | rs8177374   | pathogenic & protective  | 0.167546 |
| 1:196659237  | C>T | HET  | CFH      | missense variant                                                | rs1061170   | pathogenic & risk factor | 0.931818 |
| 1:223285200  | G>A | HOMO | TLR5     | stop gained                                                     | rs5744168   | pathogenic & risk factor | 0.055409 |
| 12:121416650 | A>C | HET  | HNF1A    | Splice region variant & intron variant & NMD transcript variant | rs1169288   | pathogenic & risk factor | 0.424825 |
| 16:27374180  | T>C | HET  | IL4R     | missense variant                                                | rs1805015   | pathogenic & risk factor | 0.461382 |
| 16:69745145  | G>A | HET  | NQO1     | missense variant                                                | rs1800566   | pathogenic & risk factor | 0.424825 |
| 22:18901004  | C>T | HOMO | PRODH    | missense variant                                                | rs450046    | pathogenic & risk factor | 0.963287 |
| 7:150696111  | T>G | HET  | NOS3     | missense variant                                                | rs1799983   | pathogenic & risk factor | 0.936992 |

**Table S4 (related to Figure 2). Serum cytokine and chemokine concentrations in CreERT2-*Otulin*<sup>+/*flox*</sup> and CreERT2-*Otulin*<sup>LacZ/*flox*</sup> bone marrow chimeric mice.**

Tabulated serum cytokine and chemokine concentrations from terminal bleeds of CreERT2-*Otulin*<sup>+/*flox*</sup> and CreERT2-*Otulin*<sup>LacZ/*flox*</sup> chimeras and vehicle treated controls on day 5 measured by Luminex multiplex analysis. Significance level indicates the *P*-value of the difference in means between tamoxifen-treated +/*flox* and LacZ/*flox* chimeras. Green indicates upregulated cytokines/chemokines. Orange indicates downregulated cytokines/chemokines. n.s., non-significant. Data were pooled from two independent experiments. Data are presented as mean ± s.e.m., and n represents number of mice.

| Analyte  | Concentration (mean ± s.e.m.) |                          |                      |                         | Significance level |
|----------|-------------------------------|--------------------------|----------------------|-------------------------|--------------------|
|          | Tamoxifen                     |                          | Vehicle              |                         |                    |
|          | +/ <i>flox</i> , n=13         | LacZ/ <i>flox</i> , n=14 | +/ <i>flox</i> , n=2 | LacZ/ <i>flox</i> , n=2 |                    |
| G-CSF    | 470.30 ± 139.60               | 55216.0 ± 8756.0         | 227.50 ± 72.89       | 168.10 ± 62.95          | ****               |
| GM-CSF   | 669.60 ± 49.08                | 909.00 ± 82.56           | 842.5 ± 68.65        | 793.80 ± 171.20         | n.s.               |
| IFN-γ    | 4.92 ± 0.49                   | 7.56 ± 0.57              | 3.92 ± 0.72          | 3.92 ± 0.72             | n.s.               |
| IL-1α    | 477.60 ± 155.20               | 248.10 ± 41.80           | 182.80 ± 106.2       | 181.4 ± 119.50          | n.s.               |
| IL-1β    | 34.86 ± 5.30                  | 38.91 ± 2.93             | 17.26 ± 5.32         | 36.27 ± 11.12           | n.s.               |
| IL-2     | 3.69 ± 0.30                   | 3.70 ± 0.34              | 2.49 ± 0.30          | 3.18 ± 0.78             | n.s.               |
| IL-4     | 2.10 ± 0.50                   | 1.67 ± 0.25              | 2.13 ± 0.99          | 1.78 ± 0.77             | n.s.               |
| IL-5     | 41.01 ± 5.35                  | 13.75 ± 1.637            | 50.36 ± 8.01         | 37.20 ± 3.34            | ****               |
| IL-6     | 7.95 ± 2.87                   | 336.60 ± 61.09           | 23.89 ± 18.72        | 5.66 ± 2.94             | ****               |
| IL-7     | 7.54 ± 1.10                   | 10.79 ± 0.98             | 6.13 ± 0.77          | 9.27 ± 0.80             | n.s.               |
| IL-9     | 99.05 ± 52.0                  | 66.48 ± 28.89            | 87.63 ± 87.63        | 84.08 ± 84.08           | n.s.               |
| IL-10    | 7.60 ± 0.84                   | 11.79 ± 1.10             | 6.03 ± 0.48          | 4.58 ± 0.0              | n.s.               |
| IL-12p40 | 7.85 ± 0.97                   | 12.66 ± 2.53             | 3.69 ± 0.13          | 6.63 ± 0.77             | n.s.               |
| IL-12p70 | 37.80 ± 9.51                  | 50.28 ± 7.10             | 32.93 ± 14.49        | 47.06 ± 11.24           | n.s.               |
| IL-13    | 167.7 ± 14.45                 | 257.10 ± 22.29           | 203.20 ± 40.99       | 172.6 ± 40.63           | n.s.               |
| IL-15    | 20.81 ± 3.67                  | 38.78 ± 5.75             | 13.00 ± 13.00        | 15.80 ± 10.21           | n.s.               |
| IL-17    | 6.81 ± 1.20                   | 7.91 ± 1.07              | 14.47 ± 8.18         | 10.08 ± 4.51            | n.s.               |
| IP-10    | 669.60 ± 49.08                | 909.00 ± 82.56           | 842.50 ± 68.65       | 793.80 ± 171.20         | n.s.               |
| KC       | 85.53 ± 20.18                 | 450.50 ± 90.12           | 11.27 ± 0.09         | 13.25 ± 3.47            | ****               |
| MCP-1    | 167.50 ± 16.12                | 353.20 ± 35.05           | 111.90 ± 11.45       | 154.00 ± 22.24          | ****               |
| MIP-1α   | 111.70 ± 12.64                | 143.40 ± 6.94            | 98.10 ± 11.52        | 99.82 ± 18.26           | n.s.               |
| MIP-1β   | 49.63 ± 11.95                 | 57.89 ± 5.47             | 68.29 ± 38.41        | 53.70 ± 23.82           | n.s.               |
| MIP-2    | 110.50 ± 4.35                 | 109.60 ± 6.81            | 96.08 ± 18.75        | 110.90 ± 21.08          | n.s.               |
| RANTES   | 13.04 ± 1.52                  | 14.74 ± 0.92             | 11.27 ± 0.09         | 13.25 ± 3.47            | n.s.               |
| TNF      | 13.70 ± 2.14                  | 21.58 ± 1.67             | 9.67 ± 0.77          | 11.68 ± 1.44            | **                 |

**Table S5 (related to Figure 3). Serum cytokine and chemokine concentrations in CD4Cre-*Otulin*<sup>+/*flox*</sup> and CD4Cre-*Otulin*<sup>del/*flox*</sup> mice**

Tabulated serum cytokine and chemokine concentrations from terminal bleeds of CD4Cre-*Otulin*<sup>+/*flox*</sup> and CD4Cre-*Otulin*<sup>del/*flox*</sup> mice measured by MAGPIX multiplex analysis. Significance level indicates the *P*-value of the difference in means between +/*flox* and del/*flox* mice. Green indicates upregulated cytokines/chemokines. Orange indicates downregulated cytokines/chemokines. n.s., non-significant. Data are presented as mean ± s.e.m., and n represents number of mice.

| Analyte        | Concentration, pg/mL (mean ± s.e.m.) |                        | Significance level |
|----------------|--------------------------------------|------------------------|--------------------|
|                | +/ <i>flox</i> , n=6                 | del/ <i>flox</i> , n=6 |                    |
| G-CSF          | 472 ± 133.70                         | 382 ± 67.35            | n.s.               |
| GM-CSF         | 67.03 ± 5.22                         | 65.06 ± 5.15           | n.s.               |
| IFN- $\gamma$  | 4.89 ± 0.63                          | 8.59 ± 1.54            | n.s.               |
| IL-1 $\alpha$  | 225.20 ± 48.31                       | 173.40 ± 18.44         | n.s.               |
| IL-1 $\beta$   | 20.70 ± 1.16                         | 21.05 ± 2.71           | n.s.               |
| IL-2           | 1.63 ± 0.25                          | 1.87 ± 0.31            | n.s.               |
| IL-4           | 0.69 ± 0.16                          | 1.12 ± 0.16            | n.s.               |
| IL-5           | 13.75 ± 2.80                         | 20.30 ± 3.53           | n.s.               |
| IL-6           | 8.31 ± 5.01                          | 21.75 ± 6.05           | n.s.               |
| IL-7           | 5.12 ± 0.39                          | 8.49 ± 2.34            | n.s.               |
| IL-9           | 100.30 ± 15.56                       | 111.10 ± 23.37         | n.s.               |
| IL-10          | 11.80 ± 1.49                         | 10.60 ± 1.26           | n.s.               |
| IL-12p40       | 10.55 ± 2.26                         | 12.05 ± 2.58           | n.s.               |
| IL-12p70       | 16.86 ± 3.59                         | 18.77 ± 2.37           | n.s.               |
| IL-13          | 114.10 ± 10.03                       | 108.80 ± 10.51         | n.s.               |
| IL-15          | 66.69 ± 5.59                         | 88.19 ± 16.51          | n.s.               |
| IL-17          | 4.41 ± 0.38                          | 5.06 ± 1.08            | n.s.               |
| IP-10          | 213.90 ± 20.94                       | 278.30 ± 27.83         | n.s.               |
| KC             | 123.10 ± 16.81                       | 142.30 ± 12.45         | n.s.               |
| MCP-1          | 70.11 ± 3.41                         | 69.87 ± 6.76           | n.s.               |
| MIP-1 $\alpha$ | 72.95 ± 6.63                         | 66.20 ± 5.47           | n.s.               |
| MIP-1 $\beta$  | 71.37 ± 5.39                         | 85.82 ± 9.37           | n.s.               |
| MIP-2          | 108.60 ± 8.87                        | 97.24 ± 6.23           | n.s.               |
| RANTES         | 33.36 ± 3.67                         | 36.37 ± 4.79           | n.s.               |
| TNF            | 5.90 ± 0.66                          | 6.58 ± 0.84            | n.s.               |

**Table S6 (related to Figure 3). Serum cytokine and chemokine concentrations in MB1Cre-*Otulin*<sup>+/*flox*</sup> and MB1Cre-*Otulin*<sup>LacZ/*flox*</sup> mice.**

Tabulated serum cytokine and chemokine concentrations from terminal bleeds of MB1Cre-*Otulin*<sup>+/*flox*</sup> and MB1Cre-*Otulin*<sup>LacZ/*flox*</sup> mice measured by MAGPIX multiplex analysis. Significance level indicates the *P*-value of the difference in means between +/*flox* and del/*flox* mice. Green indicates upregulated cytokines/chemokines. Orange indicates downregulated cytokines/chemokines. n.s., non-significant. Data are presented as mean ± s.e.m., and n represents number of mice.

| Analyte        | Concentration, pg/mL (mean ± s.e.m.) |                         | Significance level |
|----------------|--------------------------------------|-------------------------|--------------------|
|                | +/ <i>flox</i> , n=7                 | LacZ/ <i>flox</i> , n=7 |                    |
| G-CSF          | 382.10 ± 104.30                      | 195.30 ± 52.50          | n.s.               |
| GM-CSF         | 70.17 ± 6.52                         | 44.31 ± 10.87           | n.s.               |
| IFN- $\gamma$  | 5.96 ± 0.80                          | 4.50 ± 0.87             | n.s.               |
| IL-1 $\alpha$  | 344.40 ± 71.07                       | 385.90 ± 94.17          | n.s.               |
| IL-1 $\beta$   | 26.59 ± 6.29                         | 17.40 ± 2.09            | n.s.               |
| IL-2           | 2.08 ± 0.31                          | 1.12 ± 0.18             | *                  |
| IL-4           | 0.68 ± 0.10                          | 0.42 ± 0.12             | n.s.               |
| IL-5           | 20.61 ± 6.56                         | 13.55 ± 2.50            | n.s.               |
| IL-6           | 16.69 ± 13.23                        | 4.13 ± 1.52             | n.s.               |
| IL-7           | 23.12 ± 12.12                        | 10.69 ± 3.81            | n.s.               |
| IL-9           | 81.60 ± 17.04                        | 93.25 ± 21.98           | n.s.               |
| IL-10          | 30.24 ± 19.94                        | 6.91 ± 1.31             | n.s.               |
| IL-12p40       | 6.73 ± 2.52                          | 6.50 ± 2.55             | n.s.               |
| IL-12p70       | 14.51 ± 2.41                         | 8.48 ± 3.77             | n.s.               |
| IL-13          | 115.10 ± 17.32                       | 112 ± 18.97             | n.s.               |
| IL-15          | 87.39 ± 10.94                        | 71.03 ± 9.04            | n.s.               |
| IL-17          | 19.29 ± 16.61                        | 2.28 ± 0.49             | n.s.               |
| IP-10          | 207.70 ± 14.76                       | 224.80 ± 37.63          | n.s.               |
| KC             | 124.90 ± 22.66                       | 101.90 ± 15.74          | n.s.               |
| MCP-1          | 71.70 ± 7.63                         | 58.56 ± 6.29            | n.s.               |
| MIP-1 $\alpha$ | 81.64 ± 19.47                        | 62.16 ± 10.30           | n.s.               |
| MIP-1 $\beta$  | 55.18 ± 18.55                        | 38.87 ± 11.42           | n.s.               |
| MIP-2          | 97.23 ± 3.58                         | 83.28 ± 9.91            | n.s.               |
| RANTES         | 29.32 ± 5.74                         | 16.34 ± 3.21            | n.s.               |
| TNF            | 5.49 ± 0.66                          | 4.40 ± 0.83             | n.s.               |

**Table S7 (related to Figure 3). Serum cytokine and chemokine concentrations in LysMCre-Otulin<sup>+flox</sup> and LysMCre-Otulin<sup>LacZ/flox</sup> mice.**

Tabulated serum cytokine and chemokine concentrations from terminal bleeds of sex- and age-matched 4 - 9 month old LysMCre-Otulin<sup>+flox</sup> and LysMCre-Otulin<sup>LacZ/flox</sup> mice measured by MAGPIX multiplex analysis. Significance level indicates the *P*-value of the difference in means between LysMCre-Otulin<sup>+flox</sup> and LysMCre-Otulin<sup>LacZ/flox</sup> mice. Green indicates upregulated cytokines/chemokines. n.s., non-significant. Data were pooled from three independent experiments. Data are presented as mean ± s.e.m., and n represents number of mice.

| Analyte        | Concentration, pg/mL (mean ± s.e.m.) |                  | Significance level |
|----------------|--------------------------------------|------------------|--------------------|
|                | +flox, n=12                          | LacZ/flox, n=12  |                    |
| G-CSF          | 195.50 ± 49.79                       | 3285.00 ± 968.50 | ****               |
| GM-CSF         | 17.96 ± 7.66                         | 108.20 ± 28.01   | ***                |
| IFN- $\gamma$  | 0.97 ± 0.29                          | 16.09 ± 6.75     | **                 |
| IL-1 $\alpha$  | 851.20 ± 246.60                      | 465.60 ± 84.46   | n.s.               |
| IL-1 $\beta$   | 6.81 ± 1.51                          | 35.01 ± 4.08     | ****               |
| IL-2           | 0.53 ± 0.17                          | 7.06 ± 2.85      | ****               |
| IL-4           | 0.30 ± 0.13                          | 3.50 ± 1.04      | **                 |
| IL-5           | 8.97 ± 2.10                          | 20.43 ± 3.40     | **                 |
| IL-6           | 1.94 ± 1.34                          | 79.81 ± 26.76    | ***                |
| IL-7           | 7.71 ± 4.00                          | 7.29 ± 2.12      | n.s.               |
| IL-9           | 30.39 ± 8.69                         | 149.8 ± 63.42    | n.s.               |
| IL-10          | 2.87 ± 1.10                          | 20.03 ± 4.60     | ****               |
| IL-12p40       | 3.76 ± 1.24                          | 4.84 ± 2.38      | n.s.               |
| IL-12p70       | 0.21 ± 0.17                          | 20.81 ± 7.28     | ***                |
| IL-13          | 86.84 ± 10.47                        | 229.6 ± 63.56    | *                  |
| IL-15          | 14.76 ± 10.34                        | 9.80 ± 3.96      | n.s.               |
| IL-17          | 0.78 ± 0.41                          | 6.25 ± 2.67      | n.s.               |
| IP-10          | 256.30 ± 16.23                       | 774.70 ± 49.75   | ****               |
| KC             | 89.69 ± 25.12                        | 164.8 ± 35.60    | n.s.               |
| MCP-1          | 55.95 ± 4.97                         | 137.10 ± 14.20   | ****               |
| MIP-1 $\alpha$ | 16.15 ± 7.46                         | 174.50 ± 53.86   | ****               |
| MIP-1 $\beta$  | 9.63 ± 5.20                          | 31.68 ± 13.49    | n.s.               |
| MIP-2          | 92.14 ± 9.69                         | 70.53 ± 5.56     | n.s.               |
| RANTES         | 7.87 ± 1.37                          | 14.24 ± 2.03     | *                  |
| TNF            | 4.79 ± 0.40                          | 20.58 ± 1.59     | ****               |



**Table S8 (related to Key Resources Table). Primer sequences for quantitative RT-PCR.**

| <b>Sequence-Based Reagents - Primers</b>                               |            |     |
|------------------------------------------------------------------------|------------|-----|
| 18S <i>rRNA</i> RT-qPCR F primer<br>5'-GTAACCCGTTGAACCCATT-3'          | This paper | N/A |
| 18S <i>rRNA</i> RT-qPCR R primer<br>5'-CCATCCAATCGGTAGTAGCG-3'         | This paper | N/A |
| Mouse <i>Tnf</i> RT-qPCR F primer<br>5'-GGTCTGGGCCATAGAACTGA-3'        | This paper | N/A |
| Mouse <i>Tnf</i> RT-qPCR R primer<br>5'-CAGCCTCTTCTCATTCTGC-3'         | This paper | N/A |
| Mouse <i>Ilf6</i> RT-qPCR F primer<br>5'-TCTGAAGGACTCTGGCTTTG-3'       | This paper | N/A |
| Mouse <i>Ilf6</i> RT-qPCR R primer<br>5'-GATGGATGCTACCAAAGTGA-3'       | This paper | N/A |
| Mouse <i>Nfkb1a</i> RT-qPCR F primer<br>5'-CCAAGTGCAGGAACGAGTCT-3'     | This paper | N/A |
| Mouse <i>Nfkb1a</i> RT-qPCR R primer<br>5'-AAGGACGAGGAGTACGAGCA-3'     | This paper | N/A |
| Mouse <i>Tnfaip3</i> RT-qPCR F primer<br>5'-TTCCTCAGGACCAGGTCAGT-3'    | This paper | N/A |
| Mouse <i>Tnfaip3</i> RT-qPCR R primer<br>5'-AAGCTCGTGGCTCTGAAAAC-3'    | This paper | N/A |
| Mouse <i>Hoip/Rnf31</i> RT-qPCR F primer<br>5'-TACGGTTGTATGGCTATA-3'   | This paper | N/A |
| Mouse <i>Hoip/Rnf31</i> RT-qPCR R primer<br>5'-GTATTCATCTGGTTCCTC-3'   | This paper | N/A |
| Mouse <i>Hoil-1/Rbck1</i> RT-qPCR F primer<br>5'-GCACTTTCATCAACAAAC-3' | This paper | N/A |
| Mouse <i>Hoil-1/Rbck1</i> RT-qPCR R primer<br>5'-AGGTATCTGGTAGGTCTC-3' | This paper | N/A |
| Mouse <i>Sharpin</i> RT-qPCR F primer<br>5'-GAACTGGTATTGTCTTGTGTA-3'   | This paper | N/A |
| Mouse <i>Sharpin</i> RT-qPCR R primer<br>5'-AGAAGGCAAGGATGAACT-3'      | This paper | N/A |
